# Supplementary material for: Post-meiotic DNA double-strand breaks occur in Tetrahymena, and require Topoisomerase II and Spo11
Source: eLife journal article supplement (doi:10.7554/elife.26176), 2017-06-16
Supplement: supp [file elife-26176-supp-v1.zip]

Archive with 10 entries (10 files):
- elife_poa_e26176_Figure_2_figure_supplement_1.pdf
- elife_poa_e26176_Figure_6_source_data_1.xlsx
- elife_poa_e26176_Figure_8_figure_supplement_1.pdf
- elife_poa_e26176_Figure_5_source_data_2.xlsx
- elife_poa_e26176_Figure_5_source_data_1.xlsx
- elife_poa_e26176_Figure_10_source_data_1.xlsx
- elife_poa_e26176_Figure_3_figure_supplement_1.pdf
- elife_poa_e26176_Figure_6_source_data_2.xlsx
- elife_poa_e26176_Figure_3_figure_supplement_2.pdf
- elife_poa_e26176_Figure_9_figure_supplement_1.pdf
