# Supplementary material for: Post-meiotic DNA double-strand breaks occur in Tetrahymena, and require Topoisomerase II and Spo11
Source: eLife journal article supplement (doi:10.7554/elife.26176), 2017-06-16
Supplement: supp [file elife-26176-supp-v1.zip › elife_poa_e26176_Figure_5_source_data_1.xlsx]

## Sheet: Sheet1
Source data 1. Normal development is significantly reduced in TOP2gi crosses
	# Mating cells	# Normal	# Amicronucleate	# Other classes*	% Normal	% Amicronucleate	# Other classes		Tukey HSD
Wild-type	58	52	4	2	89.6552	6.89655	3.44828		Normal	Q statistic	p-value	interference
	76	72	0	4	94.7368	0	5.26316		Wild-type vs TOP2gi	65.1396	0.0010053	** p<0.01
	68	60	2	6	88.2353	2.94118	8.82353
TOP2gi	46	0	33	13	0	71.7391	28.2609		Amicronucleate	Q statistic	p-value	interference
	52	0	40	12	0	76.9231	23.0769		Wild-type vs TOP2gi	21.9361	0.0010053	** p<0.01
	44	0	28	16	0	63.6364	36.3636
*The other classes consist of cells with mating stages categorized as neither “normal development” nor “amicronucleate,” such as meiosis and post-zygotic divisions, as well as those the process of degrading pronuclei.
