# Supplementary material for: Post-meiotic DNA double-strand breaks occur in Tetrahymena, and require Topoisomerase II and Spo11
Source: eLife journal article supplement (doi:10.7554/elife.26176), 2017-06-16
Supplement: supp [file elife-26176-supp-v1.zip › elife_poa_e26176_Figure_5_source_data_2.xlsx]

## Sheet: Sheet1
Source data 2. Post-meiotic γH2AX formation is significantly reduced in TOP2gi crosses
	# Mating cells with pronuclei	# Pronuclei with γH2AX	% Pronuclei with γH2AX		Tukey HSD
Wild-type	70	67	95.7143		Pronuclei with γH2AX	Q statistic	p-value	interference
	66	64	96.9697		Wild-type vs TOP2gi	73.0522	0.0010053	** p<0.01
	83	82	98.7952
TOP2gi	58	4	6.89655
	61	1	1.63934
	65	2	3.07692
