# Supplementary material for: Post-meiotic DNA double-strand breaks occur in Tetrahymena, and require Topoisomerase II and Spo11
Source: eLife journal article supplement (doi:10.7554/elife.26176), 2017-06-16
Supplement: supp [file elife-26176-supp-v1.zip › elife_poa_e26176_Figure_6_source_data_1.xlsx]

## Sheet: Sheet1
Source data 1. Normal development is significantly reduced in ΔSPO11 and SPO11i crosses.
	# Mating cells	# Normal	# Amicronucleate	# Other classes*	% Normal	% Amicronucleate	# Other classes		Tukey HSD
Wild-type	64	64	0	0	100	0	0		Normal	Q statistic	p-value	interference
	72	70	0	2	97.22	0	2.77778		Wild-type vs ΔSPO11	23.4099	0.0010053	** p<0.01
	58	54	0	4	93.1	0	6.89655		Wild-type vs SPO11i	10.143	0.0010053	** p<0.01
ΔSPO11	68	0	56	12	0	82.35	17.6471		ΔSPO11 vs SPO11i	13.2668	0.0010053	** p<0.01
	64	0	56	8	0	87.5	12.5
	44	0	40	4	0	90.91	9.09091		Amicronucleate	Q statistic	p-value	interference
SPO11i	42	18	12	12	42.86	28.57	28.5714		Wild-type vs ΔSPO11	24.9722	0.0010053	** p<0.01
	40	22	6	12	55	15	30		Wild-type vs SPO11i	7.3645	0.0047809	** p<0.01
	24	16	8	0	66.67	33.33	0		ΔSPO11 vs SPO11i	17.6077	0.0010053	** p<0.01
*The other classes consist of cells with mating stages categorized as neither “normal development” nor “amicronucleate,” such as meiosis and post-zygotic divisions, as well as those the process of degrading pronuclei.
