# Supplementary material for: Post-meiotic DNA double-strand breaks occur in Tetrahymena, and require Topoisomerase II and Spo11
Source: eLife journal article supplement (doi:10.7554/elife.26176), 2017-06-16
Supplement: supp [file elife-26176-supp-v1.zip › elife_poa_e26176_Figure_6_source_data_2.xlsx]

## Sheet: Sheet1
Source data 2. Post-meiotic γH2AX formation is significantly reduced in ΔSPO11 and SPO11i crosses.
	# Mating cells with pronuclei	# Pronuclei with γH2AX	% Pronuclei with γH2AX		Tukey HSD
Wild-type	64	63	98.4375		Pronuclei with γH2AX	Q statistic	p-value	interference
	59	55	93.2203		Wild-type vs ΔSPO11	18.3886	0.0010053	** p<0.01
	62	59	95.1613		Wild-type vs SPO11i	7.4758	0.0044343	** p<0.01
ΔSPO11	67	0	0		ΔSPO11 vs SPO11i	10.9128	0.0010053	** p<0.01
	60	2	3.33333
	55	1	1.81818
SPO11i	44	18	40.9091
	57	40	70.1754
	49	30	61.2245
