# Supplementary material for: Post-meiotic DNA double-strand breaks occur in Tetrahymena, and require Topoisomerase II and Spo11
Source: eLife journal article supplement (doi:10.7554/elife.26176), 2017-06-16
Supplement: supp [file elife-26176-supp-v1.zip › elife_poa_e26176_Figure_10_source_data_1.xlsx]

## Sheet: Sheet1
Source data 1. Appearance of H3K56ac and Asf1-GFP is significantly prevented in TOP2gi and ΔSPO11 crosses.
	# Mating cells with pronuclei	# Pronucleus with H3K56ac	% Pronucleus with H3K56ac	# Pronucleus with Asf1-GFP	% Pronucleus with Asf1-GFP		Tukey HSD
Wild-type	58	58	100	58	100		Pronucleus with H3K56ac	Q statistic	p-value	interference
	49	49	100	49	100		Wild-type vs TOP2gi	207.173	0.0010053	** p<0.01
	67	67	100	67	100		Wild-type vs ΔSPO11	209.851	0.0010053	** p<0.01
TOP2gi	47	1	2.12766	1	2.12766
	58	2	3.44828	1	1.72414		Pronucleus with Asf1-GFP	Q statistic	p-value	interference
	45	1	2.22222	1	2.22222		Wild-type vs TOP2gi	238.647	0.0010053	** p<0.01
ΔSPO11	56	0	0	0	0		Wild-type vs ΔSPO11	240.314	0.0010053	** p<0.01
	43	1	2.32558	1	2.32558
	59	1	1.69492	1	1.69492
