# Supplementary figures and images for: Post-meiotic DNA double-strand breaks occur in Tetrahymena, and require Topoisomerase II and Spo11
Source: eLife journal article supplement (doi:10.7554/elife.26176), 2017-06-16

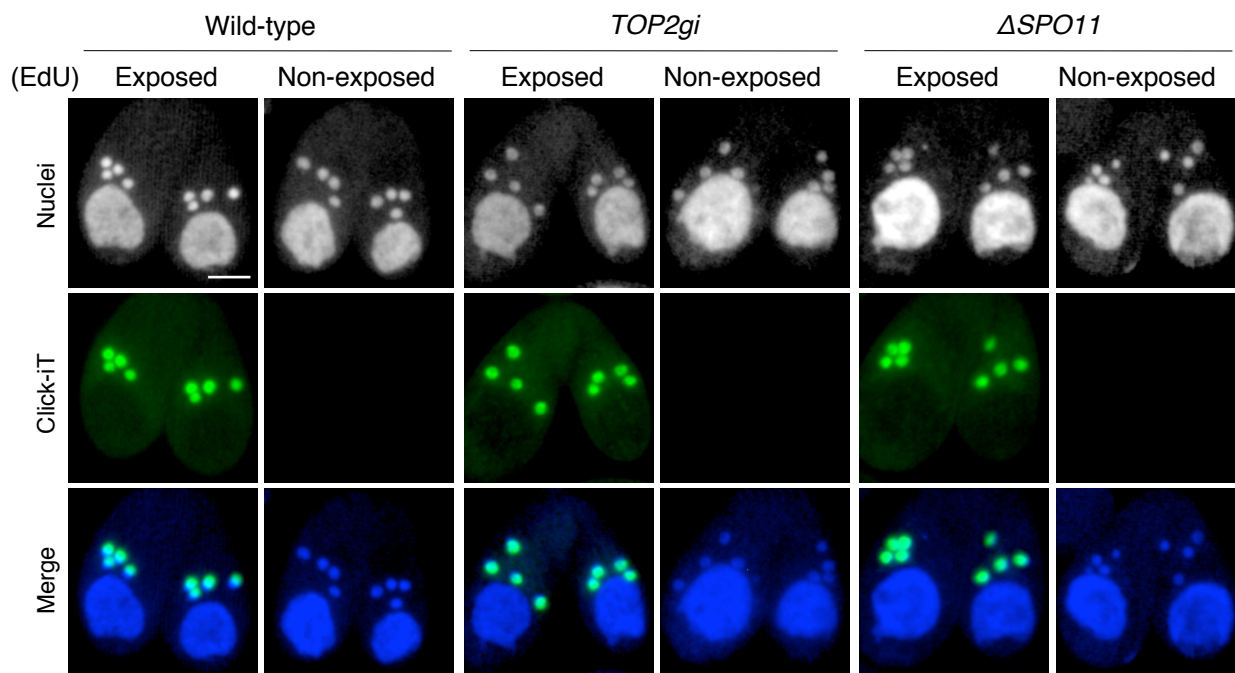

Figure 8-figure supplement 1

Supplement: supp [file elife-26176-supp-v1.zip]

A

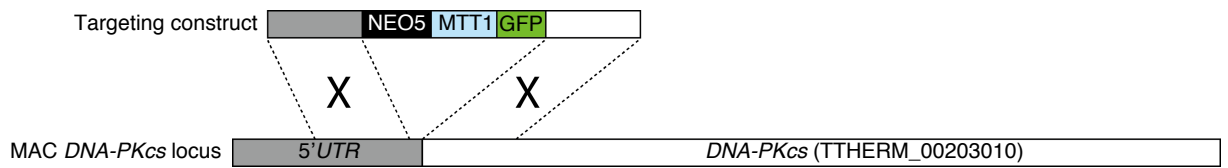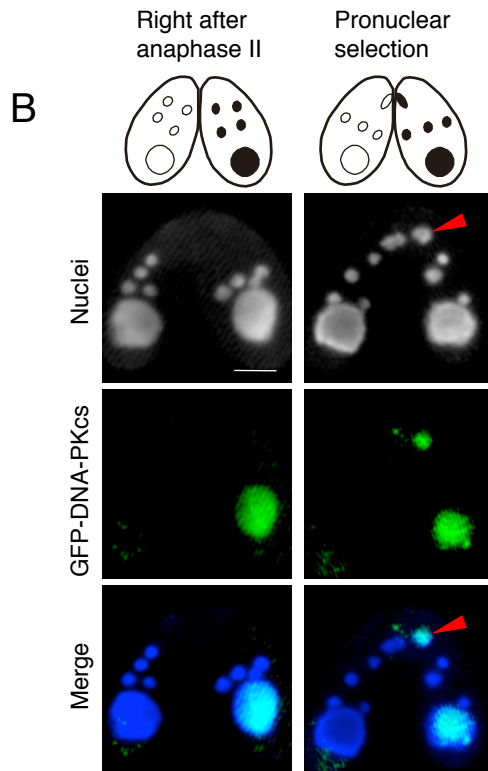

Figure 3-figure supplement 1

Supplement: supp [file elife-26176-supp-v1.zip]

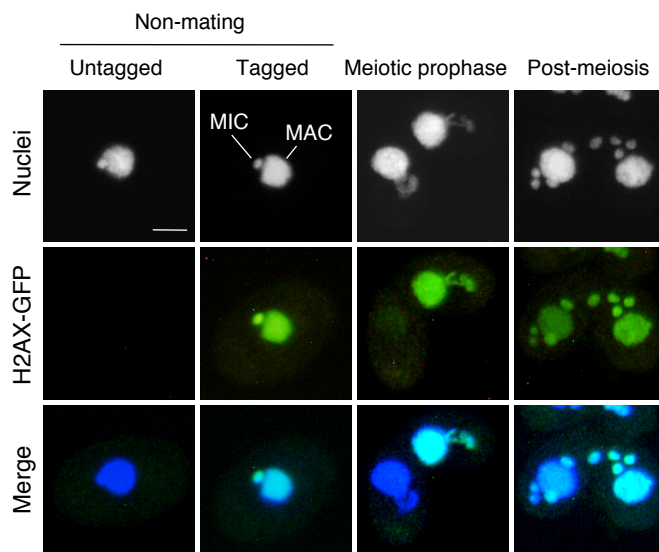

**Figure 2-figure supplement 1**

Supplement: supp [file elife-26176-supp-v1.zip]

A

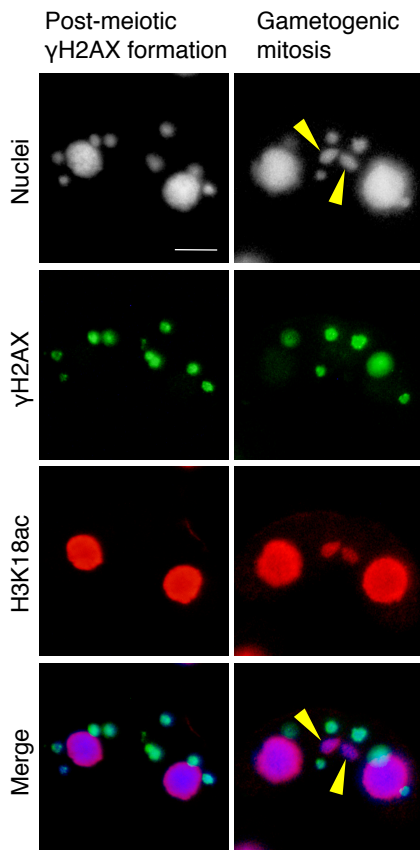

B

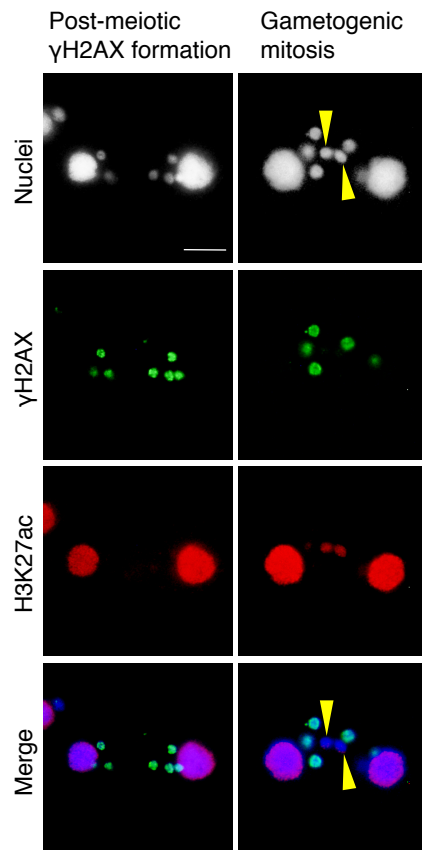

Figure 9-figure supplement 1

Supplement: supp [file elife-26176-supp-v1.zip]

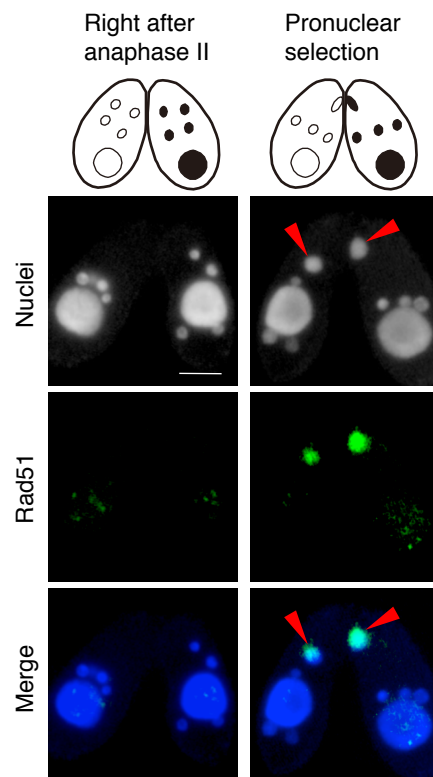

**Figure 3-figure supplement 2**

Supplement: supp [file elife-26176-supp-v1.zip]
